# Supplementary material for: Exposure to low intensity ultrasound removes paclitaxel cytotoxicity in breast and ovarian cancer cells
Source: PubMed Central journal article supplement (PMC8408969; doi:10.1186/s12885-021-08722-7), 2021-09-01
Supplement: 12885_2021_8722_MOESM1_ESM.pdf [file 12885_2021_8722_MOESM1_ESM.pdf]

# Supplementary Figure 1

## A. OVCAR3

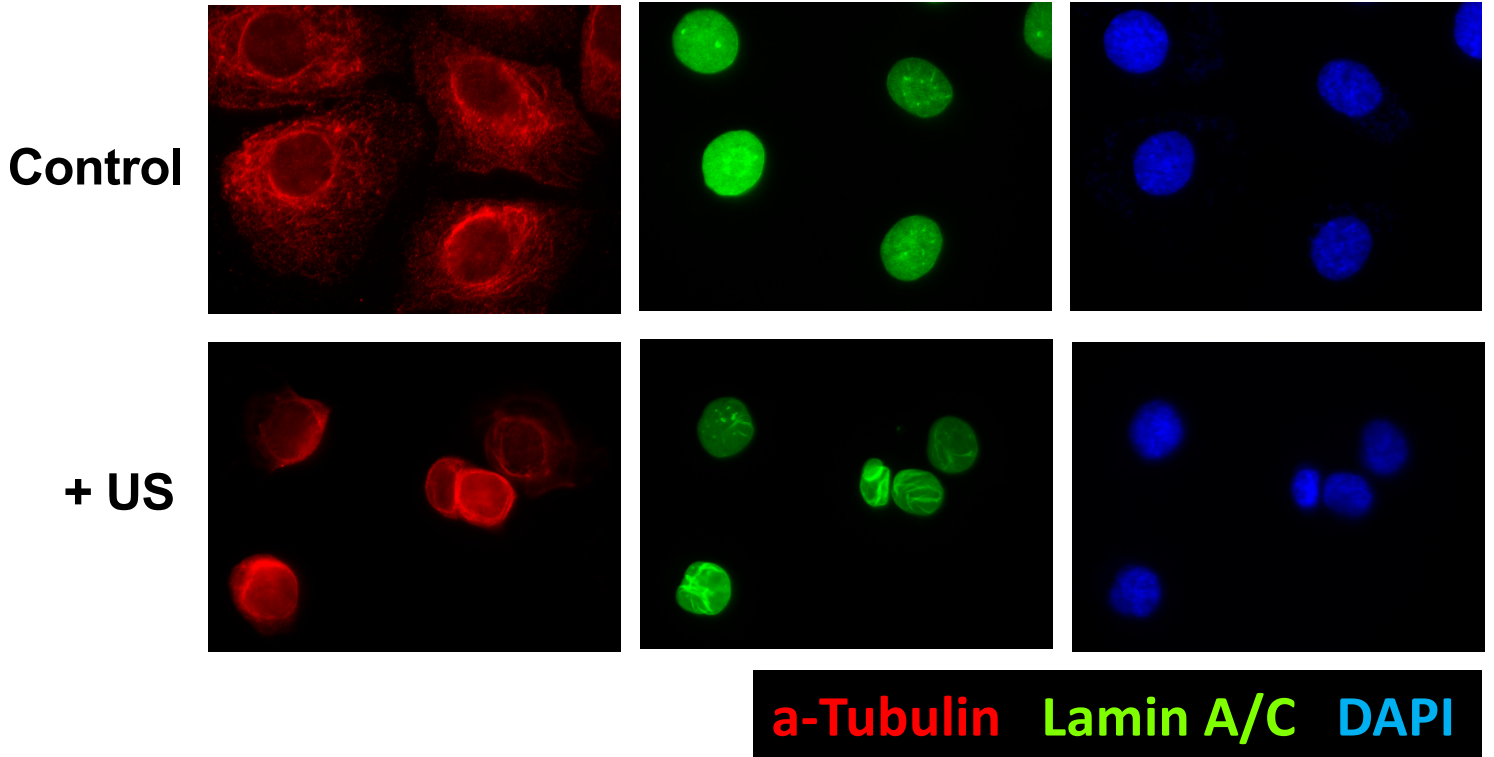

## B. OVCAR3

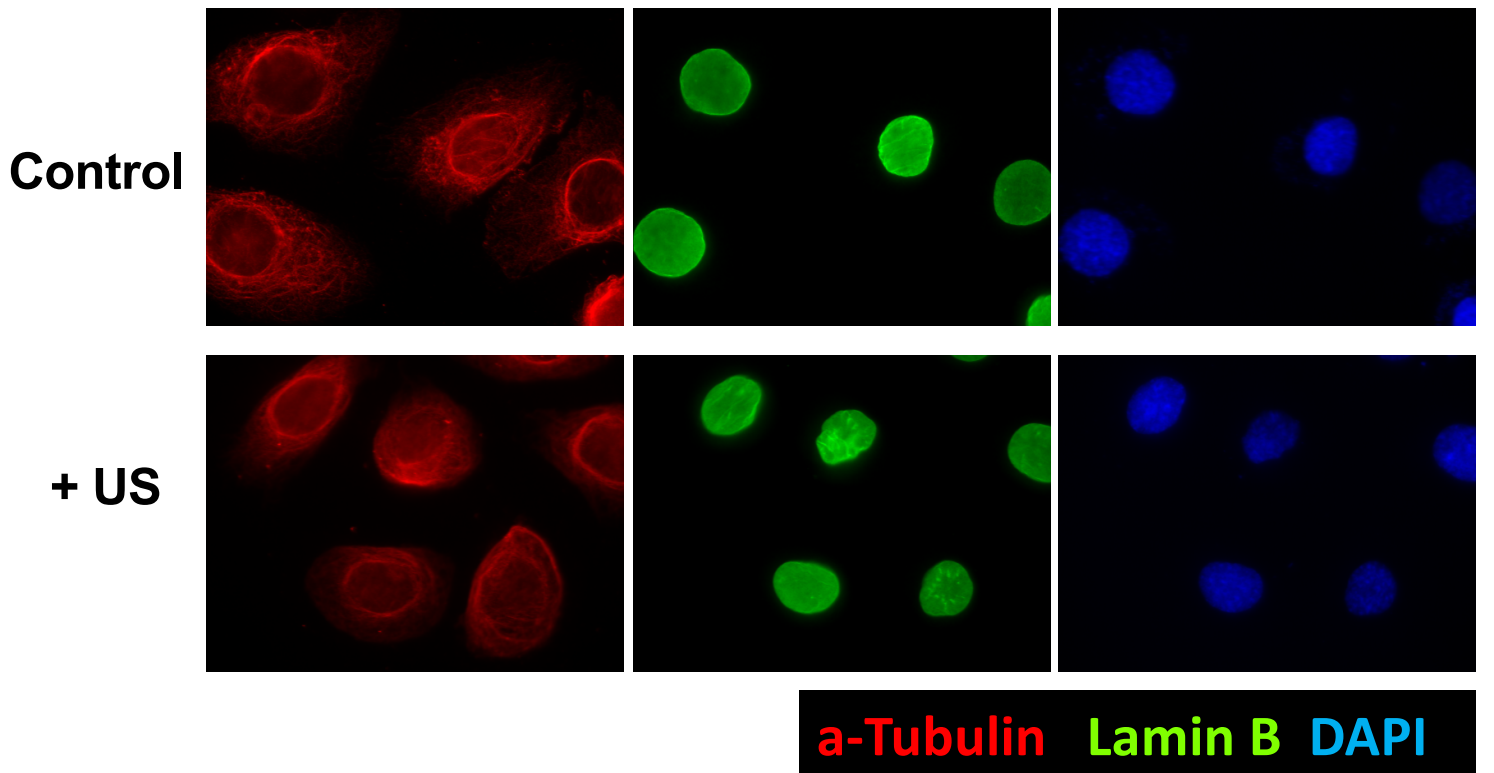

## Supplementary Figure 2

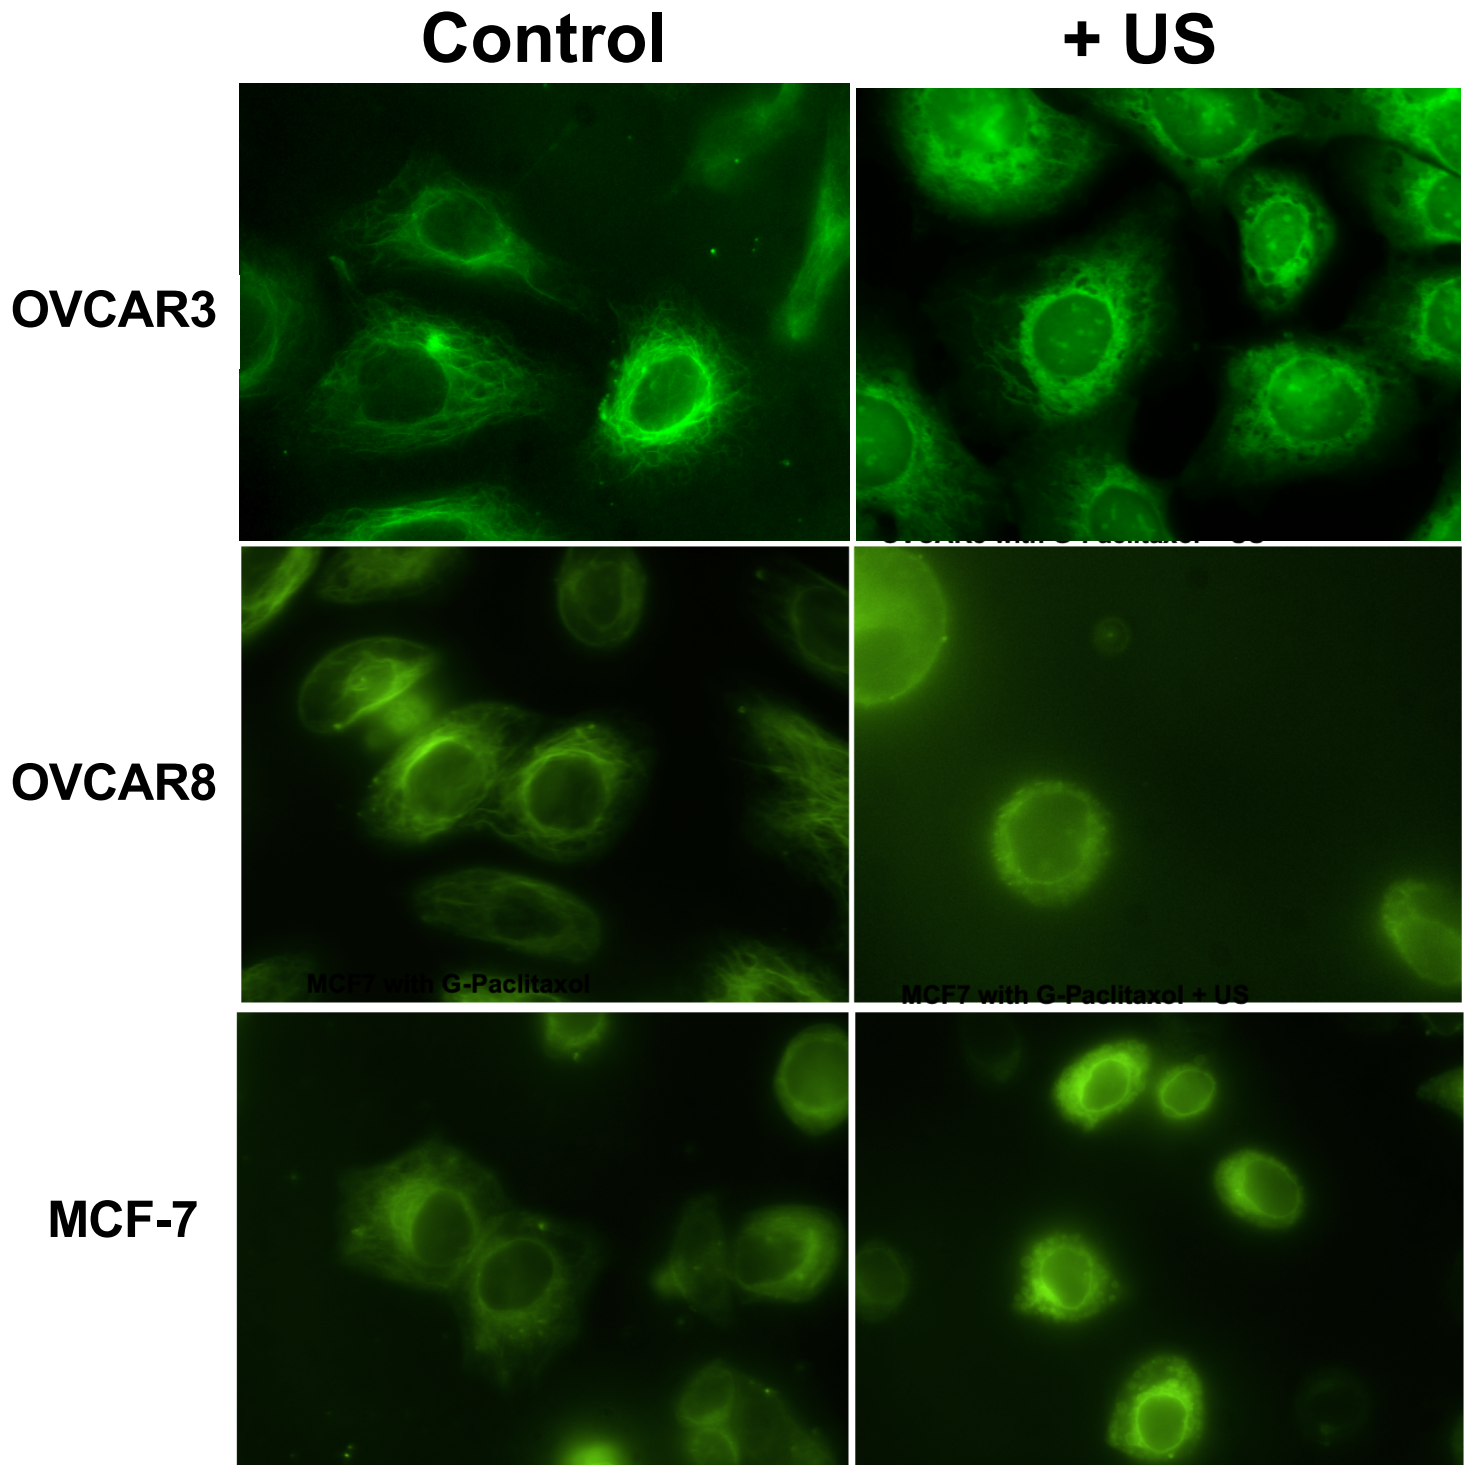

**PTX-488**

# Supplementary Figure 3

Control

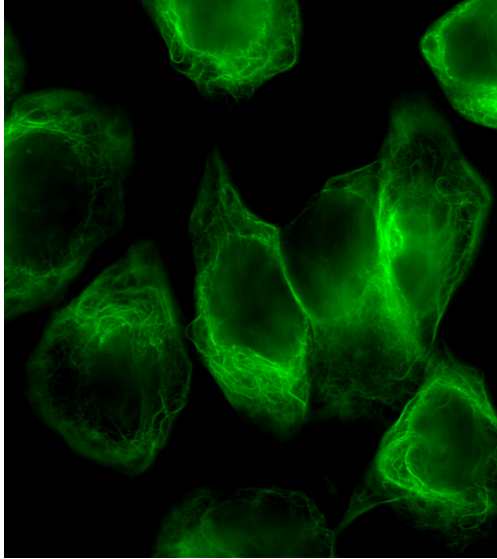

+ US, 0 min

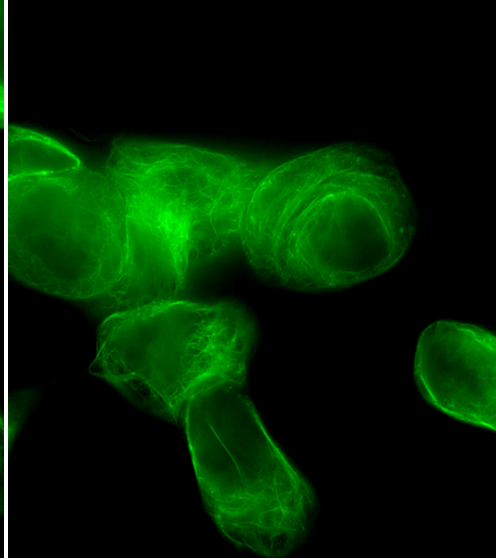

+ US, 10 min

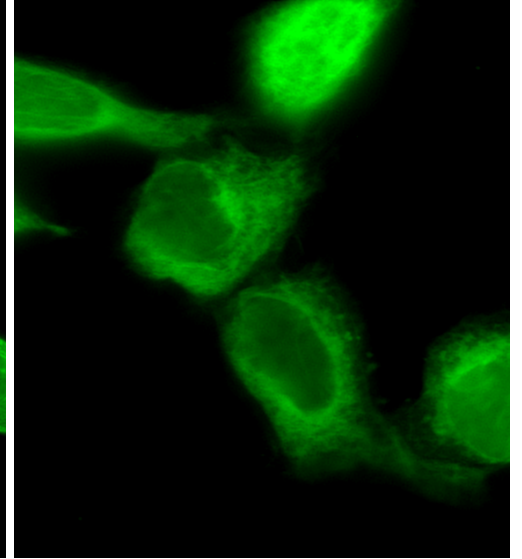

+ US, 20 min

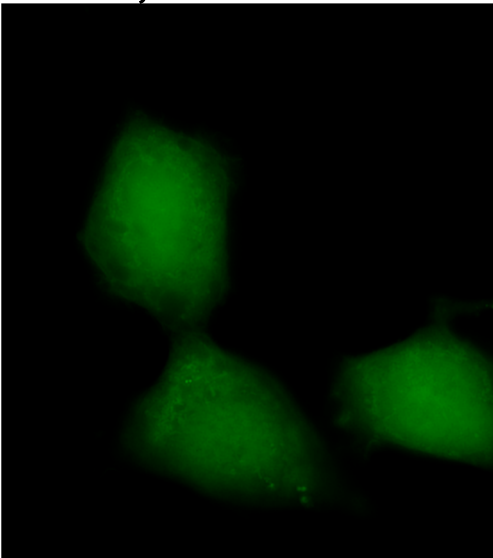

+ US, 30 min

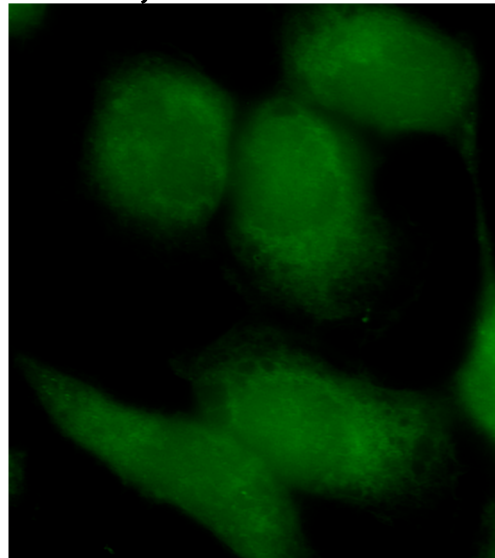

Ovcar3  
US 45kHz

PTX-488
